# Supplementary material for: Psychometric Properties of the CASP-12 Scale in Portugal: An Analysis Using SHARE Data
Source: MDPI journal article supplement (doi:10.3390/ijerph17186610), 2020-09-11
Supplement: s1 [file s1]

## Supplementary material

**Table S1.** Summary of confirmatory factor analysis with 1, 3 and 4 factors.

| Loadings                                              | 1-factor<br>model | 4 factors            |                | 3 factors             |                |
|-------------------------------------------------------|-------------------|----------------------|----------------|-----------------------|----------------|
| <b>1. Age prevents from doing things<br/>(ac014_)</b> | <b>0.53</b>       | Control              | 0.63           | Control +<br>autonomy | 0.62           |
| 2. Out of control (ac015_)                            | 0.53              |                      | 0.70           |                       | 0.67           |
| 3. Feel left out of things (ac016_)                   | 0.54              |                      | 0.65           |                       | 0.64           |
| 4. Do the things you want to do<br>(ac017_r)          | 0.54              | Autonomy             | 0.51           |                       | 0.50           |
| 5. Family responsibilities prevent<br>(ac018_)        | 0.24              |                      | 0.25           |                       | 0.30           |
| 6. Shortage of money stops (ac019_)                   | 0.29              |                      | 0.31           |                       | 0.34           |
| 7. Look forward to each day<br>(ac020_r)              | 0.33              | Pleasure             | 0.43           | Pleasure              | 0.43           |
| 8. Life has meaning (ac021_r)                         | 0.58              |                      | 0.75           |                       | 0.76           |
| 9. Look back on life with happiness<br>(ac022_r)      | 0.32              |                      | 0.43           |                       | 0.43           |
| 10. Feel full of energy (ac023_r)                     | 0.70              | Self-<br>realization | 0.68           | Self-realization      | 0.67           |
| 11. Full of opportunities (ac024_r)                   | 0.63              |                      | 0.71           |                       | 0.71           |
| 12. Future looks good (ac025_r)                       | 0.63              |                      | 0.70           |                       | 0.7            |
| <b>Fit indexes</b>                                    |                   |                      |                |                       |                |
| $\chi^2$ (df)                                         | 850.77 (54)       |                      | 444.59<br>(48) |                       | 497.42<br>(51) |
| RMSEA                                                 | 0.100             |                      | 0.075          |                       | 0.077          |
| CFI                                                   | 0.791             |                      | 0.896          |                       | 0.883          |
| RMSR                                                  | 0.064             |                      | 0.046          |                       | 0.050          |
| R <sup>2</sup>                                        | 0.827             |                      | 0.954          |                       | 0.952          |

Df: degrees of freedom; RMSEA: root mean square error of approximation; CFI: comparative fit index;  
RMSR: standardized mean-square residual.
